# Supplementary material for: HuR Promotes the Differentiation of Goat Skeletal Muscle Satellite Cells by Regulating Myomaker mRNA Stability
Source: MDPI journal article supplement (doi:10.3390/ijms24086893), 2023-04-07
Supplement: s1 [file s1]

**Table S1.** Primers used in this study.

| Gene      | Primer                     | sequence (5'-3')                                           | T <sub>m</sub> /°C | Product Size/bp |
|-----------|----------------------------|------------------------------------------------------------|--------------------|-----------------|
| CHRNA1    | CHRNA1-F<br>CHRNA1-R       | AGTGGGTGCGGAAGGTTTT<br>GGGGTGTGTGATCAGGGGAG                | 55                 | 182             |
| CAPN6     | CAPN6-F<br>CAPN6-R         | AGCCTAGAGGACTTTTGCCG<br>TTGTGCTCATCCTCTGGCAC               | 57                 | 215             |
| MYOM3     | MYOM3-F<br>MYOM3-R         | GTATCAGGTCCGTCAGCGAG<br>ATATGGCGCAGACGGTGTAG               | 55                 | 98              |
| COL11A1   | COL11A1-F<br>COL11A1-R     | TTTTGAGGGGGACATCCAGC<br>TCAGGTGCATACTCGTCAACC              | 64.5               | 128             |
| CDK14     | CDK14-F<br>CDK14-R         | TATTCCAGTTGCTGCGAGGG<br>TATGTGTGGCTAGGGACGGA               | 57                 | 154             |
| MYOZ2     | MYOZ2-F<br>MYOZ2-R         | ATCTCAGTAACCGTGGTGCC<br>CCGGGGTGTTAGGAGGAGTA               | 59                 | 192             |
| FMNL2     | FMNL2-F<br>FMNL2-R         | CAACCATACAGACGAGCCGA<br>CGGCACCATTAAACAGAACGC              | 61.3               | 85              |
| CKB       | CKB-F<br>CKB-R             | CCCAGGCCACCCCTATATCA<br>GCTCGTCGGTGGGCTTATAG               | 59                 | 128             |
| FGF11     | FGF11-F<br>FGF11-R         | ACCAGCTCTTTCACCCACTT<br>TAGAGAGCAGAGGCGTACAG               | 62.6               | 194             |
| SYNPO2L   | SYNPO2L-F<br>SYNPO2L-R     | TCCAAGATCCGAAGACGGAG<br>CCCTGAGGCATCGATAAGGC               | 61.4               | 132             |
| HuR       | HuR-F<br>HuR-R             | TGACCCAGGATGAGCTACGA<br>AAGCTGTGTCCTGCCACTTT               | 59                 | 91              |
| Myomaker  | Myomaker-F<br>Myomaker-R   | CTTCAGCATCTACGGGACGG<br>ATGGTCAGGACGCCAAACAT               | 55.7               | 108             |
| MyHC      | MyHC-F<br>MyHC-R           | CCACATCTTCTCCATCTCTG<br>GGTTCCTCCTTCTTCTTCTC               | 60.7               | 177             |
| MyoD      | MyoD-F<br>MyoD-R           | GTGCAAACGCAAGACGACTA<br>GCTGGTTTGGGTTGCTAGAC               | 60.4               | 128             |
| MyoG      | MyoG-F<br>MyoG-R           | GGACCCTACAGATGCCCACAA<br>TTGGTATGGTTTCATCTGGG              | 59                 | 101             |
| GAPDH     | GAPDH-F<br>GAPDH-R         | GCAAGTCCACGGCACAG<br>GGTTCACGCCCATCACAA                    | 59                 | 249             |
| PGK1      | PGK1-F<br>PGK1-R           | TGGACCTGTGGGTGTATT<br>CTGACTTTATCCTCCGTGTT                 | 59                 | 159             |
| Actin     | Actin-F<br>Actin-R         | CCTGCGGCATTACGAAACTAC<br>ACAGCACCGTGTGGCGTAGAG             | 59                 | 87              |
| PEGFP-HuR | PEGFP-HuR-F<br>PEGFP-HuR-R | CCGCTCGAGATGTCTAATGGTTATGAAGA<br>CCCAAGCTTTTTGTGGGACTTGTGG | 60.8               | 1000            |
